# Supplementary material for: Establishment and Evaluation of an In Vitro System for Biophysical Stimulation of Human Osteoblasts
Source: PubMed Central journal article supplement (PMC7564340; doi:10.3390/cells9091995), 2020-08-30
Supplement: cells-09-01995-s001.pdf [file cells-09-01995-s001.pdf]

## Supplementary Material

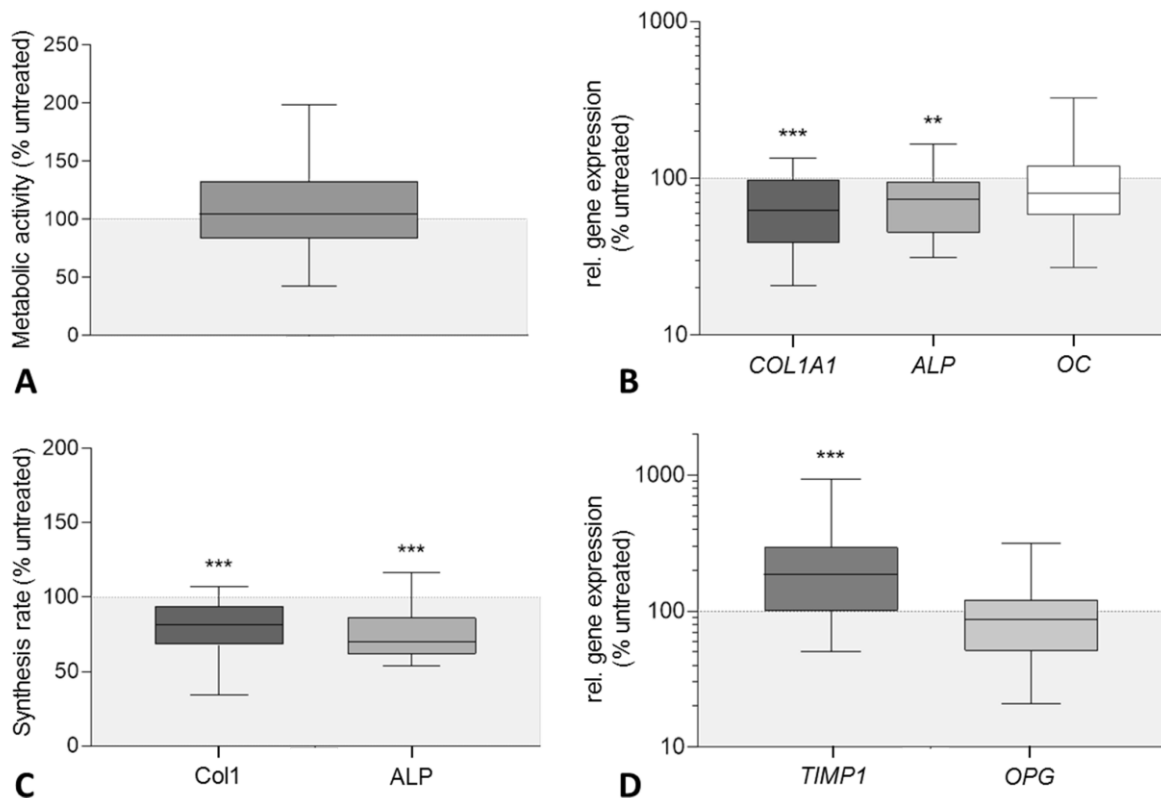

**Figure S1.** Influence of a static pressure load of 527 Pa conducted by titanium bodies [load] on osteoblastic viability (**A**) and expression of osteogenic markers (**B–D**). Human osteoblasts were seeded on collagen scaffolds and loaded with Ti6Al4V bodies for three days. Untreated cells served as control. **A:** The metabolic activity was determined colorimetrically by the conversion of tetrazolium salt to formazan (WST-1,  $n = 23$ ). **(B)** Synthesis rates of procollagen type 1 and alkaline phosphatase (ALP) (untreated cells served as control). The release of procollagen type 1 propeptide in the cell culture supernatant was determined using ELISA and related to the total protein concentration. The ALP activity was determined colorimetrically by the hydrolysis of p-nitrophenyl phosphate (both:  $n \geq 21$ ). **(C,D):** Relative gene expression of osteogenic markers for bone formation: collagen type I alpha 1 chain (COL1A1), alkaline phosphatase (ALP) and osteocalcin (OC) and bone remodeling: tissue inhibitor of metalloproteinase 1 (TIMP1) and osteoprotegerin (OPG). Gene expression of COL1A1, ALP, OC (all in Figure **B**), TIMP1 and OPG (both in Figure **C**) was determined via semi-quantitative polymerase chain reaction (qPCR). Results are presented as the percentage of  $2^{-\Delta\Delta Ct}$  related to the untreated controls ( $n = 23$ ). All data are presented as box plots related to the untreated controls. \*\*  $p < 0.01$ ; \*\*\*  $p < 0.001$  compared to the untreated controls (Wilcoxon's signed-rank test).
